# Supplementary material for: Food Security Impacts of the COVID-19 Pandemic: Following a Cohort of Vermonters During the First Year
Source: bioRxiv or medRxiv preprint supplement (doi:10.1101/2021.10.20.21265283), 2021-10-21
Supplement: Supplementary file [file media-1.pdf]

## Appendix A

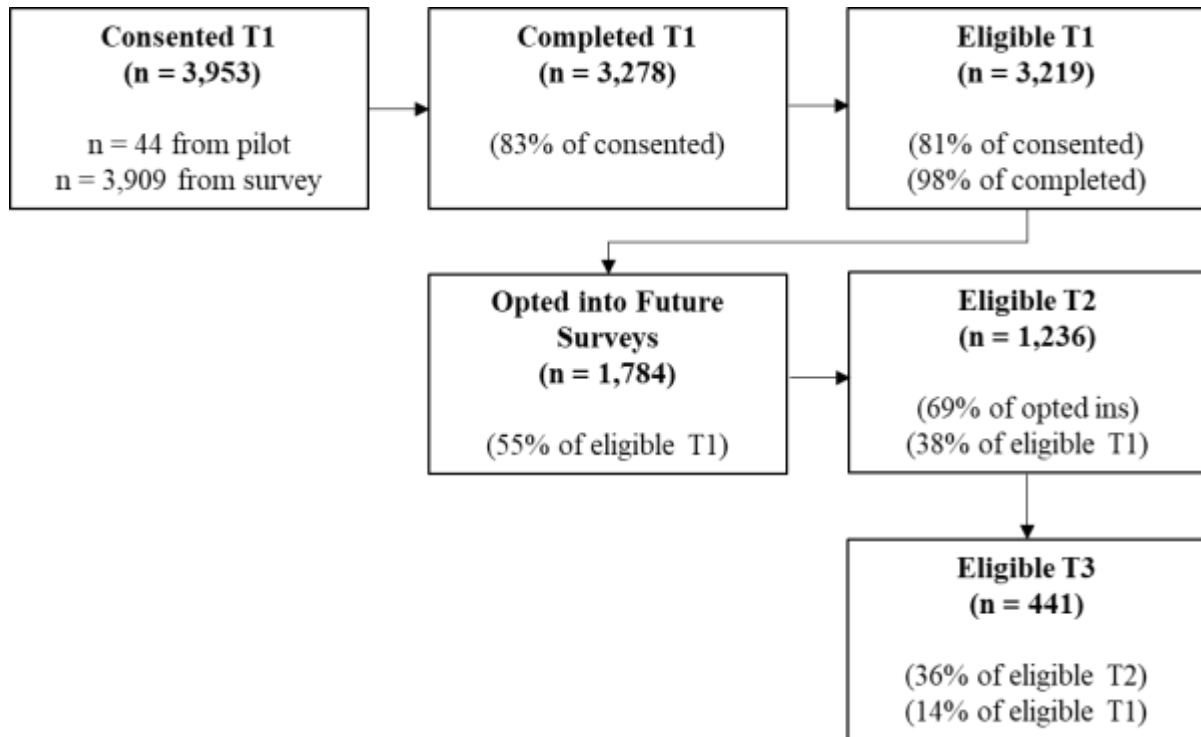

**Figure A1.** Breakdown of response to each survey

**Table A1.** Complete list of variables, questions, and scales used in the analysis

| <b>Variable</b>                   | <b>Question</b>                                                                                                                                                                                                                                                                                      | <b>Scale</b>                                                                                                                                                                                           |
|-----------------------------------|------------------------------------------------------------------------------------------------------------------------------------------------------------------------------------------------------------------------------------------------------------------------------------------------------|--------------------------------------------------------------------------------------------------------------------------------------------------------------------------------------------------------|
| Food secure                       | Determined based on the responses to the U.S Household Food Security Survey Module: Six-Item Short Form. These households were not classified as food insecure at any time during COVID-19.                                                                                                          | Binary (1 = Food secure, 0 = Food insecure)                                                                                                                                                            |
| Food insecure                     | Determined based on the responses to the U.S Household Food Security Survey Module: Six-Item Short Form. These households were food insecure at any time during COVID-19, including newly food insecure and consistently food insecure households.                                                   | Binary (1 = Food insecure, 0 = Food secure)                                                                                                                                                            |
| Newly food insecure               | Determined based on the responses to the U.S Household Food Security Survey Module: Six-Item Short Form. These households were classified as not food insecure during the year prior to COVID-19, but were classified as food insecure at some point during the first year of the COVID-19 pandemic. | Binary (1 = Newly food insecure, 0 = Consistently food insecure)                                                                                                                                       |
| Consistently food insecure        | Determined based on the responses to the U.S Household Food Security Survey Module: Six-Item Short Form. These households were classified as food insecure both in the year prior to COVID-19 and at anytime during the first year of the COVID-19 pandemic.                                         | Binary (1 = Consistently food insecure, 0 = Newly food insecure)                                                                                                                                       |
| Recovered in March 2021           | Determined based on the responses to the U.S Household Food Security Survey Module: Six-Item Short Form. These households were food insecure at any point since the start of the pandemic, but were food secure in March 2021.                                                                       | Binary (1 = Recovered, 0 = Still food insecure)                                                                                                                                                        |
| Still food insecure in March 2021 | Determined based on the responses to the U.S Household Food Security Survey Module: Six-Item Short Form. These households were food insecure at any point since the start of the COVID-19 pandemic and were still food insecure in March 2021                                                        | Binary (1 = Still food insecure, 0 = Recovered)                                                                                                                                                        |
| Age                               | In what year were you born? (age determined by subtracting birth year from 2020)                                                                                                                                                                                                                     | Continuous                                                                                                                                                                                             |
| Age (binary)                      | Determined based on the responses to age question                                                                                                                                                                                                                                                    | Binary (1 = 63 and over, 0 = 18-62)                                                                                                                                                                    |
| Household size                    | How many people in the following age groups currently live in your household (household defined as those currently living within your household, including family and non-family members)?                                                                                                           | Number of people in each category (under 5, 5-17, 18-65, over 65)                                                                                                                                      |
| Households with children          | Whether respondent indicated any children in response to household size question                                                                                                                                                                                                                     | Binary (1 = Yes, 0 = No)                                                                                                                                                                               |
| Gender                            | Which of the following best describes your gender identity?                                                                                                                                                                                                                                          | 1 = Male, 2 = Female, 3 = Transgender, 4 = Non-binary, 5 = Self describe                                                                                                                               |
| Gender (binary)                   | Determined based on the responses to gender question                                                                                                                                                                                                                                                 | Binary (1 = Female, 0 = Not female)                                                                                                                                                                    |
| Race (binary)                     | Determined based on the responses to the questions "What is your race? Check all that apply"                                                                                                                                                                                                         | Binary (1 = White, 0 = Non-white)                                                                                                                                                                      |
| Ethnicity (binary)                | Are you of Hispanic, Latino, or Spanish origin?                                                                                                                                                                                                                                                      | Binary (1 = Hispanic, 0 = Not Hispanic)                                                                                                                                                                |
| Race and ethnicity (binary)       | Determined based on the responses to the race and ethnicity questions                                                                                                                                                                                                                                | Binary (1 = BIPOC and/or Hispanic, 0 = Non-Hispanic white)                                                                                                                                             |
| Education                         | What is the highest level of formal education that you have?                                                                                                                                                                                                                                         | Categorical (1 = Some high school, 2 = High school graduate/GED, 3 = Some college, 4 = Associates degree/technical school/apprenticeship, 5 = Bachelor's degree, 6 = Postgraduate/professional degree) |
| Education (binary)                | Indication of associates degree/technical school/apprenticeship, bachelor's degree, or postgraduate/professional degree in education question                                                                                                                                                        | Binary (1 = College degree, 0 = No college degree)                                                                                                                                                     |

**Table A1. Continued**

| <b>Variable</b>                                    | <b>Question</b>                                                                                                                                                                                                                                                             | <b>Scale</b>                                                                                                                                                                                                                                                       |
|----------------------------------------------------|-----------------------------------------------------------------------------------------------------------------------------------------------------------------------------------------------------------------------------------------------------------------------------|--------------------------------------------------------------------------------------------------------------------------------------------------------------------------------------------------------------------------------------------------------------------|
| Household income                                   | Which of the following best describes your household income range in 2020 before taxes?                                                                                                                                                                                     | 1 = Less than \$10,000, 2 = \$10,000 to \$14,999, 3 = \$15,000 to \$24,999, 4 = \$25,000 to \$34,999, 5 = \$35,000 to \$49,999, 6 = \$50,000 to \$74,999, 7 = \$75,000 to \$99,999, 8 = \$100,000 to \$149,999, 9 = \$150,000 to \$199,999, 10 = \$200,000 or more |
| Household income (binary)                          | Determined based on the responses to household income question                                                                                                                                                                                                              | Binary (1 = \$50,000 or more, 0 = Less than \$50,000)                                                                                                                                                                                                              |
| Rural/urban classification                         | Determined based on the responses to the question "What is your ZIP code?" ZIP codes were categorized using the Rural-Urban Commuting Area codes and the four category classification scheme.                                                                               | Categorical (1 = Urban, 2 = Large rural, 3 = Small rural, 4 = Isolated)                                                                                                                                                                                            |
| Rural/urban classification (binary)                | Determined based on rural/urban classification variable. Rural = large rural, small rural, and isolated.                                                                                                                                                                    | Binary (1 = Urban, 0 = Rural)                                                                                                                                                                                                                                      |
| SNAP participation                                 | Determined based on the responses to question "Which of the following food assistance programs did your household use? Check all that apply." In each survey, the question was asked for the following reference periods:                                                   | Binary (1 = Yes, 0 = No)                                                                                                                                                                                                                                           |
| WIC participation                                  |                                                                                                                                                                                                                                                                             | Binary (1 = Yes, 0 = No)                                                                                                                                                                                                                                           |
| P-EBT participation                                |                                                                                                                                                                                                                                                                             | Binary (1 = Yes, 0 = No)                                                                                                                                                                                                                                           |
| School meals participation                         | T1: in the year prior to COVID-19; since the coronavirus outbreak (March 11th)                                                                                                                                                                                              | Binary (1 = Yes, 0 = No)                                                                                                                                                                                                                                           |
| Food pantry participation                          | T2: in the last 30 days                                                                                                                                                                                                                                                     | Binary (1 = Yes, 0 = No)                                                                                                                                                                                                                                           |
|                                                    | T3: since the coronavirus outbreak (March 2020); in the last 30 days                                                                                                                                                                                                        |                                                                                                                                                                                                                                                                    |
| Any food assistance program participation (binary) | Determined based on the responses to the questions about individual program use                                                                                                                                                                                             | Binary (1 = Yes, 0 = No)                                                                                                                                                                                                                                           |
| Job disruption during COVID-19 pandemic            | Determined based on the responses to the questions: "Have you or anyone in your household experienced a loss of income, reduction in hours, furlough, or job loss since the COVID-19 outbreak? Check all that apply" and "In which month(s) did this job disruption occur?" | Binary (1 = Yes, 0 = No)                                                                                                                                                                                                                                           |
| Job disruption in March 2021                       |                                                                                                                                                                                                                                                                             | Binary (1 = Yes, 0 = No)                                                                                                                                                                                                                                           |
| Type of job disruption                             |                                                                                                                                                                                                                                                                             | Categorical (1 = Job loss, 2 = Loss of income/hours, 3 = Furlough, 4 = Other)                                                                                                                                                                                      |
| Length of job disruption                           |                                                                                                                                                                                                                                                                             | Continuous                                                                                                                                                                                                                                                         |
| Received unemployment                              | Have you received any money from these sources since the COVID-19 outbreak? Check all that apply.                                                                                                                                                                           | Binary (1 = Yes, 0 = No)                                                                                                                                                                                                                                           |



**Table A2.** Full characteristics of survey respondents, by food security category

| Characteristic                |                                                     | Respondents<br>(n = 441)<br>no. (%) | Vermont<br>Population <sup>1</sup><br>(%) | Food Security Category   |                            |                                                 |                                    |
|-------------------------------|-----------------------------------------------------|-------------------------------------|-------------------------------------------|--------------------------|----------------------------|-------------------------------------------------|------------------------------------|
|                               |                                                     |                                     |                                           | Food Secure<br>(n = 307) | Food Insecure<br>(n = 134) | Consistently<br>Insecure (n<br>= 61)<br>no. (%) | Newly Food<br>Insecure<br>(n = 69) |
|                               |                                                     |                                     |                                           |                          |                            |                                                 |                                    |
| Age                           | 18 - 34                                             | 49 (11.1)                           | 27.6                                      | 29 (9.4)                 | 20 (14.9)                  | 11 (18.0)                                       | 9 (13.0)                           |
|                               | 35 - 62                                             | 225 (51.0)                          | 45.6                                      | 138 (45.0)               | 87 (64.9)                  | 40 (65.6)                                       | 47 (68.2)                          |
|                               | 63+                                                 | 167 (37.9)                          | 26.8                                      | 140 (45.6)               | 27 (20.1)                  | 10 (16.4)                                       | 13 (18.8)                          |
| Household<br>size             | 1 - 2                                               | 268 (62.8)                          | 69.3                                      | 208 (69.1)               | 60 (47.6)                  | 23 (39.7)                                       | 36 (53.7)                          |
|                               | 2 - 4                                               | 126 (29.5)                          | 25.0                                      | 82 (27.2)                | 44 (34.9)                  | 18 (31.0)                                       | 26 (38.8)                          |
|                               | 5 or more                                           | 33 (7.7)                            | 5.6                                       | 11 (3.7)                 | 22 (17.5)                  | 17 (29.3)                                       | 5 (7.5)                            |
| Gender                        | Female                                              | 347 (79.8)                          | 50.7                                      | 231 (76.0)               | 116 (88.5)                 | 52 (85.2)                                       | 63 (91.3)                          |
|                               | Male                                                | 86 (19.8)                           | 49.3                                      | 71 (23.4)                | 15 (11.5)                  | 9 (14.8)                                        | 6 (8.7)                            |
|                               | Non-binary                                          | 2 (0.5)                             | --                                        | 2 (0.7)                  | 0 (0.0)                    | 0 (0.0)                                         | 0 (0.0)                            |
|                               | Transgender                                         | 0 (0.0)                             | --                                        | 0 (0.0)                  | 0 (0.0)                    | 0 (0.0)                                         | 0 (0.0)                            |
|                               | Other (self-describe)                               | 0 (0.0)                             | --                                        | 0 (0.0)                  | 0 (0.0)                    | 0 (0.0)                                         | 0 (0.0)                            |
| Race                          | White                                               | 412 (97.4)                          | 94.2                                      | 292 (98.3)               | 120 (95.2)                 | 58 (96.7)                                       | 62 (95.4)                          |
|                               | Two or more races                                   | 4 (0.9)                             | 2.0                                       | 0 (0.0)                  | 4 (3.2)                    | 1 (1.7)                                         | 2 (3.1)                            |
|                               | American Indian or Alaska Native                    | 5 (1.2)                             | 0.3                                       | 4 (1.3)                  | 1 (0.8)                    | 1 (1.7)                                         | 0 (0.0)                            |
|                               | Asian or Pacific Islander                           | 0 (0.0)                             | 1.7                                       | 0 (0.0)                  | 0 (0.0)                    | 0 (0.0)                                         | 0 (0.0)                            |
|                               | Black                                               | 2 (0.5)                             | 1.4                                       | 1 (0.3)                  | 1 (0.8)                    | 0 (0.0)                                         | 1 (1.5)                            |
| Ethnicity                     | Not Hispanic or Latino                              | 423 (98.4)                          | 98.1                                      | 298 (98.7)               | 125 (97.7)                 | 58 (96.7)                                       | 66 (98.5)                          |
|                               | Hispanic or Latino                                  | 7 (1.6)                             | 1.9                                       | 4 (1.3)                  | 3 (2.3)                    | 2 (3.3)                                         | 1 (1.5)                            |
| Education<br>level            | Some high school (no diploma)                       | 1 (0.2)                             | 5.2                                       | 0 (0.0)                  | 1 (0.8)                    | 1 (1.7)                                         | 0 (0.0)                            |
|                               | High school graduate (incl. GED)                    | 32 (7.4)                            | 29.5                                      | 13 (4.3)                 | 19 (14.6)                  | 12 (20.0)                                       | 7 (10.1)                           |
|                               | Some college (no degree)                            | 62 (14.3)                           | 17.5                                      | 28 (9.2)                 | 34 (26.2)                  | 18 (30.0)                                       | 15 (21.7)                          |
|                               | Associate degree/technical<br>school/apprenticeship | 33 (7.6)                            | 8.9                                       | 19 (6.3)                 | 15 (11.5)                  | 7 (11.7)                                        | 7 (10.1)                           |
|                               | Bachelor's degree                                   | 149 (34.3)                          | 23.0                                      | 114 (37.5)               | 35 (26.9)                  | 12 (20.0)                                       | 23 (33.3)                          |
|                               | Postgraduate/professional degree                    | 157 (36.2)                          | 15.9                                      | 130 (42.8)               | 27 (20.8)                  | 10 (16.7)                                       | 17 (24.6)                          |
| Household<br>income<br>(2020) | Less than \$10,000                                  | 13 (3.1)                            | 4.8                                       | 1 (0.3)                  | 12 (9.6)                   | 8 (13.3)                                        | 4 (6.6)                            |
|                               | \$10,000 - \$14,999                                 | 25 (6.0)                            | 5.0                                       | 9 (3.1)                  | 16 (12.8)                  | 8 (13.3)                                        | 7 (11.5)                           |
|                               | \$15,000 - \$24,999                                 | 39 (9.4)                            | 9.1                                       | 13 (4.5)                 | 26 (20.8)                  | 14 (23.3)                                       | 11 (18.0)                          |
|                               | \$25,000 - \$34,999                                 | 40 (9.6)                            | 9.1                                       | 21 (7.2)                 | 19 (15.2)                  | 9 (15.0)                                        | 10 (16.4)                          |
|                               | \$35,000 - \$49,999                                 | 58 (13.9)                           | 12.2                                      | 38 (13.1)                | 20 (16.0)                  | 10 (16.7)                                       | 9 (14.8)                           |
|                               | \$50,000 - \$74,999                                 | 71 (17.1)                           | 18.7                                      | 53 (18.2)                | 18 (14.4)                  | 6 (10.0)                                        | 11 (18.0)                          |
|                               | \$75,000 - \$99,999                                 | 66 (15.9)                           | 14.0                                      | 59 (20.3)                | 7 (5.6)                    | 3 (5.0)                                         | 4 (6.6)                            |
|                               | \$100,000 - \$149,999                               | 66 (15.9)                           | 16.0                                      | 62 (21.3)                | 4 (3.2)                    | 1 (1.7)                                         | 3 (4.9)                            |
|                               | \$150,000 - \$199,999                               | 27 (6.5)                            | 5.6                                       | 24 (8.2)                 | 3 (2.4)                    | 1 (1.7)                                         | 2 (3.3)                            |
| \$200,000+                    | 11 (2.6)                                            | 5.5                                 | 11 (3.8)                                  | 0 (0.0)                  | 0 (0.0)                    | 0 (0.0)                                         |                                    |
| Children in<br>household      | Yes                                                 | 127 (29.7)                          | 25.2                                      | 70 (23.3)                | 57 (44.9)                  | 30 (51.7)                                       | 26 (38.2)                          |
|                               | No                                                  | 301 (70.3)                          | 74.8                                      | 231 (76.7)               | 70 (53.4)                  | 28 (48.3)                                       | 42 (61.8)                          |
| Rural/urban<br>classification | Urban                                               | 234 (54.2)                          | 33.3                                      | 167 (55.5)               | 67 (51.1)                  | 26 (42.6)                                       | 40 (58.0)                          |
|                               | Large rural                                         | 60 (13.9)                           | 20.1                                      | 37 (12.3)                | 23 (17.6)                  | 10 (16.4)                                       | 13 (18.8)                          |
|                               | Small rural                                         | 51 (11.8)                           | 18.0                                      | 34 (11.3)                | 17 (13.0)                  | 10 (16.4)                                       | 7 (10.1)                           |
|                               | Isolated                                            | 87 (20.1)                           | 28.6                                      | 63 (20.9)                | 24 (18.3)                  | 15 (24.6)                                       | 9 (13.0)                           |

Percentages may not total 100 due to rounding. Percentages are calculated using the number of respondents for that unique question and do not include missing data. <sup>1</sup>Data from the 2019 5-year American Community Survey

**Table A3.** Results of a two-sided t-test for differences in food insecurity rates between the year prior to the COVID-19 pandemic and March 2020

| <b>Variable</b>                  | <b>n</b> | <b>Mean</b> | <b>Std Error</b> | <b>Std Dev</b> | <b>95% Confidence Interval</b> |       |
|----------------------------------|----------|-------------|------------------|----------------|--------------------------------|-------|
| Food insecure previous 12 months | 432      | 0.148       | 0.017            | 0.356          | 0.115                          | 0.182 |
| Food insecure March 2020         | 427      | 0.241       | 0.021            | 0.428          | 0.200                          | 0.282 |

*p* = 0.0006

**Table A4.** Results of a two-sided t-test for differences in food insecurity rates between March 2020 and May/June 2020

| <b>Variable</b>             | <b>n</b> | <b>Mean</b> | <b>Std Error</b> | <b>Std Dev</b> | <b>95% Confidence Interval</b> |       |
|-----------------------------|----------|-------------|------------------|----------------|--------------------------------|-------|
| Food insecure March 2020    | 427      | 0.241       | 0.021            | 0.428          | 0.200                          | 0.282 |
| Food insecure May/June 2020 | 436      | 0.174       | 0.018            | 0.380          | 0.139                          | 0.210 |

*p* = 0.0153

**Table A5.** Results of a two-sided t-test for differences in food insecurity rates between March 2020 and March 2021

| <b>Variable</b>          | <b>n</b> | <b>Mean</b> | <b>Std Error</b> | <b>Std Dev</b> | <b>95% Confidence Interval</b> |       |
|--------------------------|----------|-------------|------------------|----------------|--------------------------------|-------|
| Food insecure March 2020 | 427      | 0.241       | 0.021            | 0.428          | 0.200                          | 0.282 |
| Food insecure March 2021 | 428      | 0.182       | 0.019            | 0.386          | 0.146                          | 0.219 |

*p* = 0.0348

**Table A6.** Results of a two-sided t-test for differences in food insecurity rates between the year prior to the COVID-19 pandemic and March 2021

| <b>Variable</b>                  | <b>n</b> | <b>Mean</b> | <b>Std Error</b> | <b>Std Dev</b> | <b>95% Confidence Interval</b> |       |
|----------------------------------|----------|-------------|------------------|----------------|--------------------------------|-------|
| Food insecure previous 12 months | 432      | 0.148       | 0.017            | 0.356          | 0.115                          | 0.182 |
| Food insecure March 2021         | 428      | 0.182       | 0.019            | 0.386          | 0.146                          | 0.219 |

*p* = 0.1786

**Table A7.** Results of a two-sided t-test for differences in reporting job disruptions during the COVID-19 pandemic between food secure and food insecure households

| <b>Variable</b> | <b>n</b> | <b>Mean</b> | <b>Std Error</b> | <b>Std Dev</b> | <b>95% Confidence Interval</b> |       |
|-----------------|----------|-------------|------------------|----------------|--------------------------------|-------|
| Food secure     | 307      | 0.459       | 0.028            | 0.499          | 0.403                          | 0.515 |
| Food insecure   | 134      | 0.731       | 0.038            | 0.445          | 0.655                          | 0.807 |

*p* = 0.0000

**Table A8.** Results of a two-sided t-test for differences in reporting job disruptions in March 2021 between food insecure and food secure households

| <b>Variable</b> | <b>n</b> | <b>Mean</b> | <b>Std Error</b> | <b>Std Dev</b> | <b>95% Confidence Interval</b> |       |
|-----------------|----------|-------------|------------------|----------------|--------------------------------|-------|
| Food secure     | 306      | 0.144       | 0.020            | 0.351          | 0.104                          | 0.183 |
| Food insecure   | 130      | 0.285       | 0.040            | 0.453          | 0.206                          | 0.363 |

*p* = 0.0005

**Table A9.** Results of a two-sided t-test for differences in use of unemployment insurance during the COVID-19 pandemic between food secure and food insecure households

| <b>Variable</b> | <b>n</b> | <b>Mean</b> | <b>Std Error</b> | <b>Std Dev</b> | <b>95% Confidence Interval</b> |       |
|-----------------|----------|-------------|------------------|----------------|--------------------------------|-------|
| Food secure     | 298      | 0.198       | 0.023            | 0.399          | 0.152                          | 0.243 |
| Food insecure   | 123      | 0.317       | 0.042            | 0.467          | 0.234                          | 0.400 |

*p* = 0.0085

**Table A10.** Results of a two-sided t-test for differences in use of P-EBT during the COVID-19 pandemic

| <b>Variable</b>                 | <b>n</b> | <b>Mean</b> | <b>Std Error</b> | <b>Std Dev</b> | <b>95% Confidence Interval</b> |       |
|---------------------------------|----------|-------------|------------------|----------------|--------------------------------|-------|
| First year of COVID-19 pandemic | 438      | 0.073       | 0.012            | 0.261          | 0.049                          | 0.098 |
| March 2021                      | 438      | 0.037       | 0.009            | 0.188          | 0.019                          | 0.054 |

*p* = 0.0175

**Table A11.** Results of a two-sided t-test for differences in use of food assistance programs during the COVID-19 pandemic between food secure and food insecure households

| <b>Variable</b> | <b>n</b> | <b>Mean</b> | <b>Std Error</b> | <b>Std Dev</b> | <b>95% Confidence Interval</b> |       |
|-----------------|----------|-------------|------------------|----------------|--------------------------------|-------|
| Food secure     | 306      | 0.163       | 0.021            | 0.370          | 0.122                          | 0.205 |
| Food insecure   | 132      | 0.674       | 0.041            | 0.470          | 0.593                          | 0.755 |

*p* = 0.0000
